# Supplementary material for: From Gram-Negative Strains to Mortality: Understanding Bacterial Resistance in Mainland China
Source: Research Square preprint supplement (doi:10.21203/rs.3.rs-5712281/v1), 2025-01-02
Supplement: Supplementary file 1 [file c1c29134d81dbf0fba86d6f7.docx]

eTable 3 Effect of four GRNB detection rate on birth rate, mortality and people grow rate: double fixed effect regression result

| **Variables** | **Birth rate  Coef.**  **(T-value)** | **Mortality rate**  **Coef.**  **(T-value)** | **Popgrow rate**  **Coef.**  **(T-value)** |
| --- | --- | --- | --- |
| Ecoli_dete (%) | 0.0673 | -0.0065 | 0.0698 |
|  | (1.0456) | (-0.2974) | (1.0948) |
| Pseud_dete (%) | 0.0052 | 0.2007*** | -0.1897 |
|  | (0.0310) | (3.5069) | (-1.1389) |
| Klebsiella_dete (%) | 0.0328 | -0.0762*** | 0.1090 |
|  | (0.4227) | (-2.8867) | (1.4185) |
| Acinet_dete (%) | 0.1445 | -0.0133 | 0.1493 |
|  | (1.2865) | (-0.3467) | (1.3420) |
| Temperature(°C） | 0.0009 | -0.0027*** | 0.0040 |
| (0.3072) | (-2.8574) | (1.4651) |
| Rainfall(mm) | 0.0052 | 0.0007 | 0.0047 |
|  | (1.4253) | (0.5802) | (1.2919) |
| GDPG (billion) | 0.0074 | 0.0028 | 0.0043 |
|  | (0.2974) | (0.3322) | (0.1725) |
| Hospital (n) | -0.0049 | 0.0060 | -0.0131 |
|  | (-0.3862) | (1.3868) | (-1.0467) |
| Crop production(kiloton) | 0.0004 | 0.0105*** | -0.0108 |
|  | (0.0515) | (3.8649) | (-1.3736) |
| Intensity (DDDs) | 0.0408** | -0.0164*** | 0.0557*** |
|  | (2.3656) | (-2.7894) | (3.2622) |
| **Per-capita consumption of major foods, (kg)** | | | |
| Grain | 0.0169 | 0.0049 | 0.0096 |
|  | (1.0117) | (0.8641) | (0.5800) |
| Edible oil | -0.0069 | -0.0049 | -0.0018 |
|  | (-0.5989) | (-1.2412) | (-0.1551) |
| Vegetables | 0.0108 | -0.0061 | 0.0170 |
|  | (0.7958) | (-1.3220) | (1.2688) |
| Meat | 0.0021 | 0.0040 | -0.0024 |
|  | (0.1603) | (0.8933) | (-0.1850) |
| Poultry | -0.0120 | -0.0008 | -0.0129 |
|  | (-0.7243) | (-0.1474) | (-0.7902) |
| Aquatic | 0.0127 | -0.0091* | 0.0233 |
|  | (0.8146) | (-1.7128) | (1.5133) |
| Egg | -0.0185 | 0.0061 | -0.0223 |
|  | (-1.2501) | (1.2152) | (-1.5205) |
| Dairy | -0.0072 | 0.0004 | -0.0066 |
|  | (-0.6812) | (0.1164) | (-0.6292) |
| Dried and fresh fruits | 0.0135 | 0.0092* | 0.0039 |
|  | (0.9553) | (1.9029) | (0.2812) |
| Sugar | 0.0004 | 0.0064* | -0.0049 |
|  | (0.0341) | (1.8085) | (-0.4688) |
| **Constant** | -0.0676 | -0.0455 | -0.0039 |
|  | (-0.5418) | (-1.0715) | (-0.0315) |
| **Prov / Year** | Yes | Yes | Yes |
| ***N*** | 248 | 248 | 248 |
| **F** | 24.5790 | 16.3943 | 39.4979 |
| **p** | <0.001 | <0.001 | <0.001 |
| **R2** | 0.7774 | 0.6997 | 0.8488 |

Note: T-values, which are in parentheses, indicate the significance of each coefficient. Additionally, p-values denote the statistical significance of the coefficients, where ** indicates p < 0.01 and * indicates p < 0.05.

Acinet_dete: Detection rate of Acinetobacter baumannii; DDD: Defined Daily Doses; Ecoli_dete: Detection rate of Escherichia coli; GDPG: GDP growth rate; Hospital: Number of included hospitals; Klebsiella_dete: Detection rate of Klebsiella pneumoniae; Popgrow rate: Population growth rate; Pseud_dete: Detection rate of Pseudomonas aeruginosa; Rainfall: Annual rainfall; Temperature: Annual mean temperature.
